# Supplementary material for: Use and Outcomes of Dexamethasone in the Management of Malignant Small Bowel Obstruction
Source: PubMed Central journal article supplement (PMC11191995; doi:10.1097/as9.0000000000000431), 2024-05-06
Supplement: as9-5-e431-s001.pdf [file as9-5-e431-s001.pdf]

Supplementary Table 1. Subgroup analysis of adjusted odds ratios for non-elective operative intervention with dexamethasone use.

|                                                                           | No<br>dexamethasone<br>(n=421) | Dexamethasone<br>(n=150) | Adjusted OR for<br>non-elective<br>operative<br>intervention with<br>dexamethasone |
|---------------------------------------------------------------------------|--------------------------------|--------------------------|------------------------------------------------------------------------------------|
| <b>History of prior surgery</b>                                           |                                |                          |                                                                                    |
| History of abdominal surgery                                              | 354 (84%)                      | 132 (88%)                | 0.6 (0.3-1.2) <sup>1</sup>                                                         |
| No history of abdominal surgery                                           | 67 (16%)                       | 18 (12%)                 | 0.3 (0.0-1.4) <sup>1</sup>                                                         |
| <b>Management factors</b>                                                 |                                |                          |                                                                                    |
| Gastrografin SBFT – no. (%)                                               | 95 (23%)                       | 18 (12%)                 | 0.7 (0.1-2.7) <sup>2</sup>                                                         |
| NGT – no. (%)                                                             | 270 (64%)                      | 112 (75%)                | 0.6 (0.3-1.1) <sup>3</sup>                                                         |
| Combined prophylactic<br>gastrostomy or endoscopic<br>PEG/stent – no. (%) | 79 (19%)                       | 38 (25%)                 | 1.1 (0.2-5.3) <sup>4</sup>                                                         |
| <b>Cancer type</b>                                                        |                                |                          |                                                                                    |
| Foregut – no. (%)                                                         | 22 (5%)                        | 22 (15%)                 | 2.6 (0.0-442) <sup>4</sup>                                                         |
| HPB – no. (%)                                                             | 43 (10%)                       | 11 (7%)                  | 3.8 (0.0-16) <sup>4</sup>                                                          |
| GI – no. (%)                                                              | 120 (29%)                      | 25 (17%)                 | 0.3 (0.0-1.4) <sup>4</sup>                                                         |
| Gyn – no. (%)                                                             | 143 (34%)                      | 61 (41%)                 | 1.0 (0.4-2.6) <sup>4</sup>                                                         |
| GU – no. (%)                                                              | 29 (6%)                        | 11 (7%)                  | 0.1 (0.0-3.1) <sup>4</sup>                                                         |

<sup>1</sup>Adjusted for age, sex, site, NGT, and Gastrografin SBFT use

<sup>2</sup>Adjusted for age, sex, history of abdominal surgery, site, and NGT use

<sup>3</sup>Adjusted for age, sex, history of abdominal surgery, site, and Gastrografin SBFT use

<sup>4</sup>Adjusted for age, sex, history of abdominal surgery, site, NGT, and Gastrografin SBFT use
